# Supplementary material for: Design of folic acid conjugated chitosan nano-cur–bioenhancers to attenuate the hormone-refractory metastatic prostate carcinoma by augmenting oral bioavailability
Source: Royal Society of Chemistry journal article supplement (doi:10.1039/c5ra17599b), 2016-01-01
Supplement: c5ra17599b1.pdf [file c5ra17599b1.pdf]

Supplementary figures

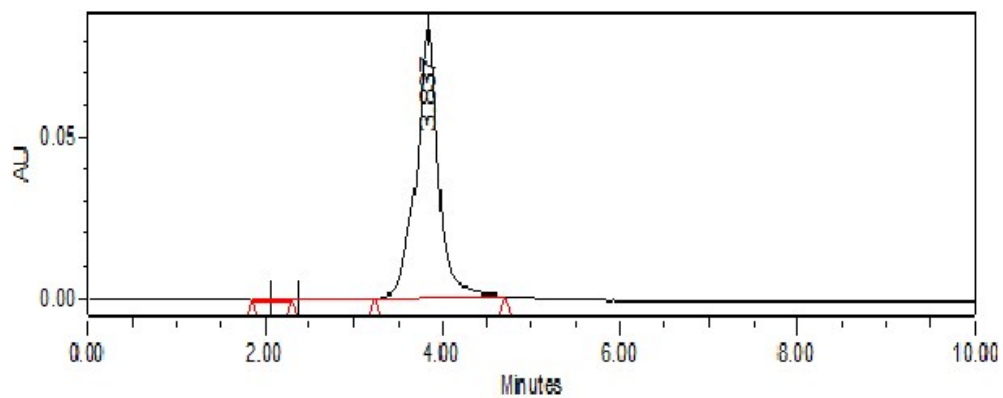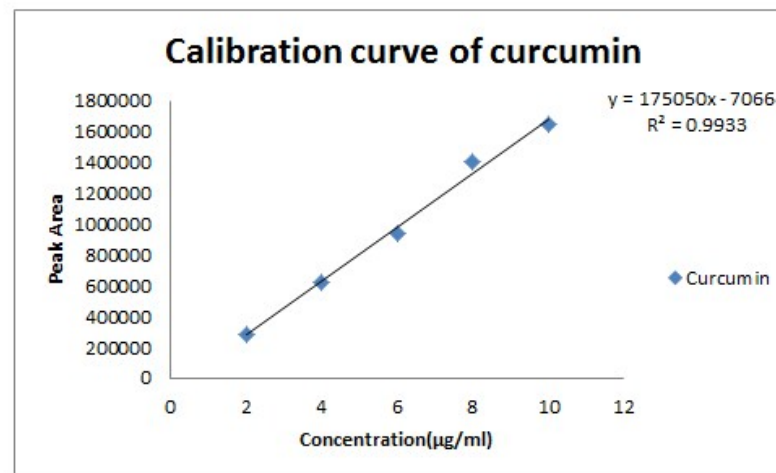

Supplementary figure 1: Graph showing the calibration curve of Curcumin

a.

|                         | Diam. (nm)    | % Intensity | Width (nm) |
|-------------------------|---------------|-------------|------------|
| Z-Average (d.nm): 271.8 | Peak 1: 255.7 | 100.0       | 56.45      |
| Pdl: 0.395              | Peak 2: 0.000 | 0.0         | 0.000      |
| Intercept: 0.810        | Peak 3: 0.000 | 0.0         | 0.000      |

Result quality : Refer to quality report

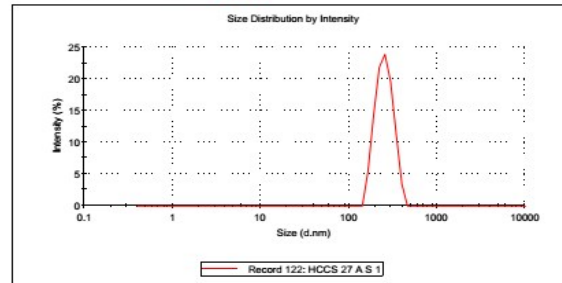

b.

|                             | Mean (mV)    | Area (%) | Width (mV) |
|-----------------------------|--------------|----------|------------|
| Zeta Potential (mV): 32.4   | Peak 1: 32.4 | 100.0    | 3.99       |
| Zeta Deviation (mV): 3.99   | Peak 2: 0.00 | 0.0      | 0.00       |
| Conductivity (mS/cm): 0.112 | Peak 3: 0.00 | 0.0      | 0.00       |

Result quality : Good

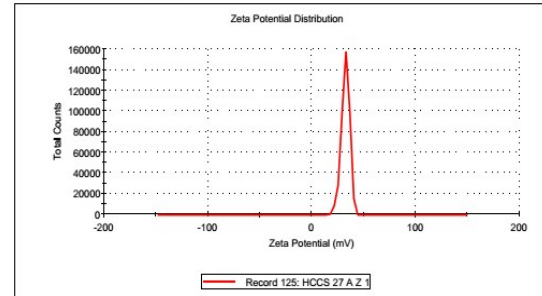

c.

|                         | Diam. (nm)    | % Intensity | Width (nm) |
|-------------------------|---------------|-------------|------------|
| Z-Average (d.nm): 338.2 | Peak 1: 196.7 | 100.0       | 31.62      |
| Pdl: 0.352              | Peak 2: 0.000 | 0.0         | 0.000      |
| Intercept: 0.669        | Peak 3: 0.000 | 0.0         | 0.000      |

Result quality : Refer to quality report

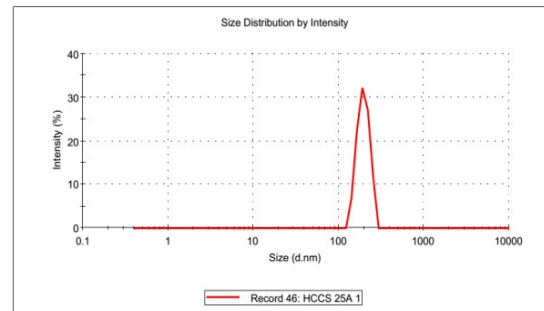

d.

|                             | Mean (mV)    | Area (%) | Width (mV) |
|-----------------------------|--------------|----------|------------|
| Zeta Potential (mV): 36.0   | Peak 1: 36.0 | 100.0    | 4.34       |
| Zeta Deviation (mV): 4.34   | Peak 2: 0.00 | 0.0      | 0.00       |
| Conductivity (mS/cm): 0.387 | Peak 3: 0.00 | 0.0      | 0.00       |

Result quality : Good

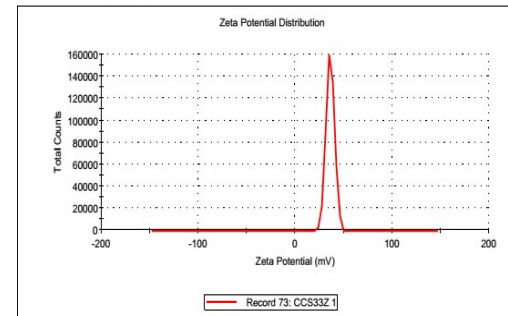

Supplementary figure 2: Size, PDI and zeta potential of CUR-CH-NPS and CUR-B-CH-NPs
